# Supplementary material for: Inducible Bronchus-Associated Lymphoid Tissues (iBALT) Serve as Sites of B Cell Selection and Maturation Following Influenza Infection in Mice
Source: PubMed Central journal article supplement (PMC6450362; doi:10.3389/fimmu.2019.00611), 2019-03-29
Supplement: Image_3.pdf [file Image_3.pdf]

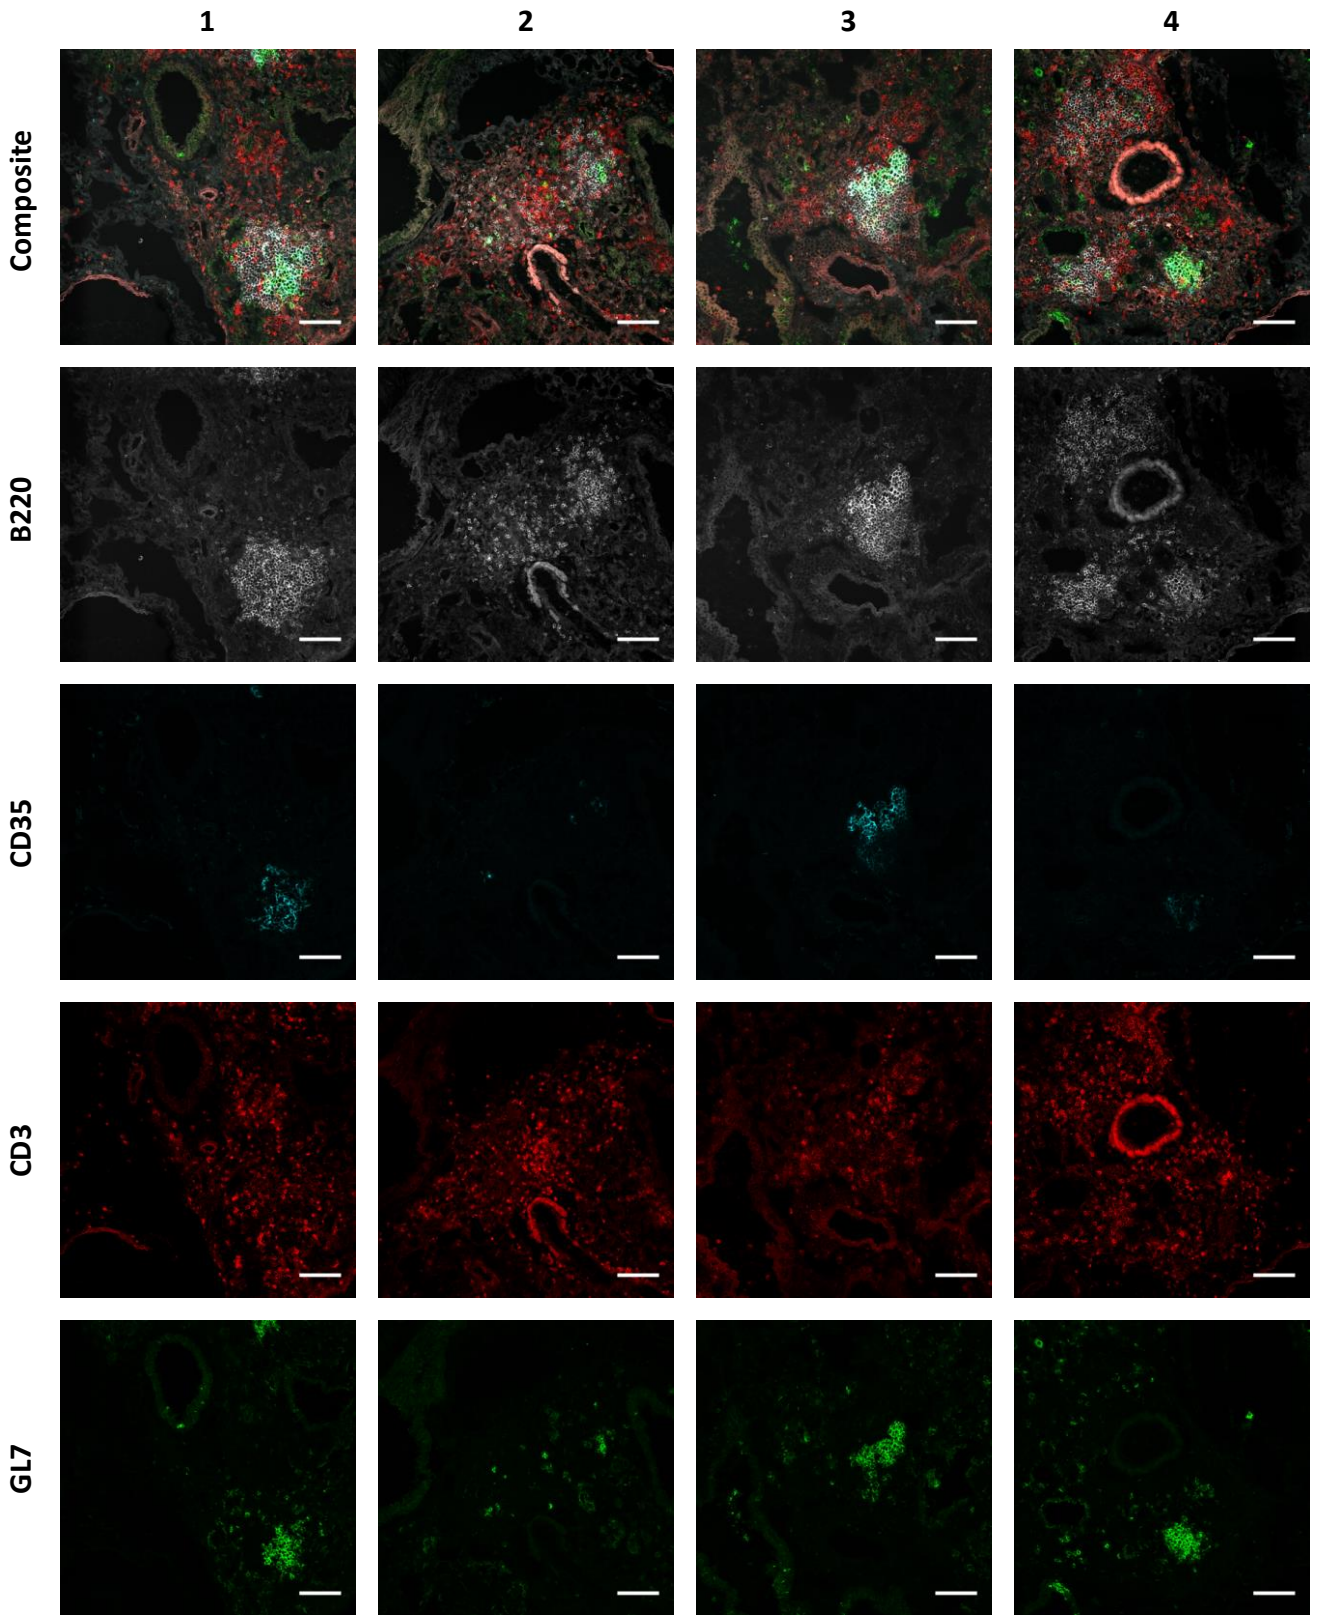

**Figure S3** - Pleiomorphic iBALT structures seen in the lung at d35 post-infection with PR8. Lung tissues were stained with B220 (grey), CD35 (cyan), CD3 (red) and GL7 (green); scale bar – 100  $\mu$ M.
