# Supplementary material for: Inducible Bronchus-Associated Lymphoid Tissues (iBALT) Serve as Sites of B Cell Selection and Maturation Following Influenza Infection in Mice
Source: PubMed Central journal article supplement (PMC6450362; doi:10.3389/fimmu.2019.00611), 2019-03-29
Supplement: Image_4.pdf [file Image_4.pdf]

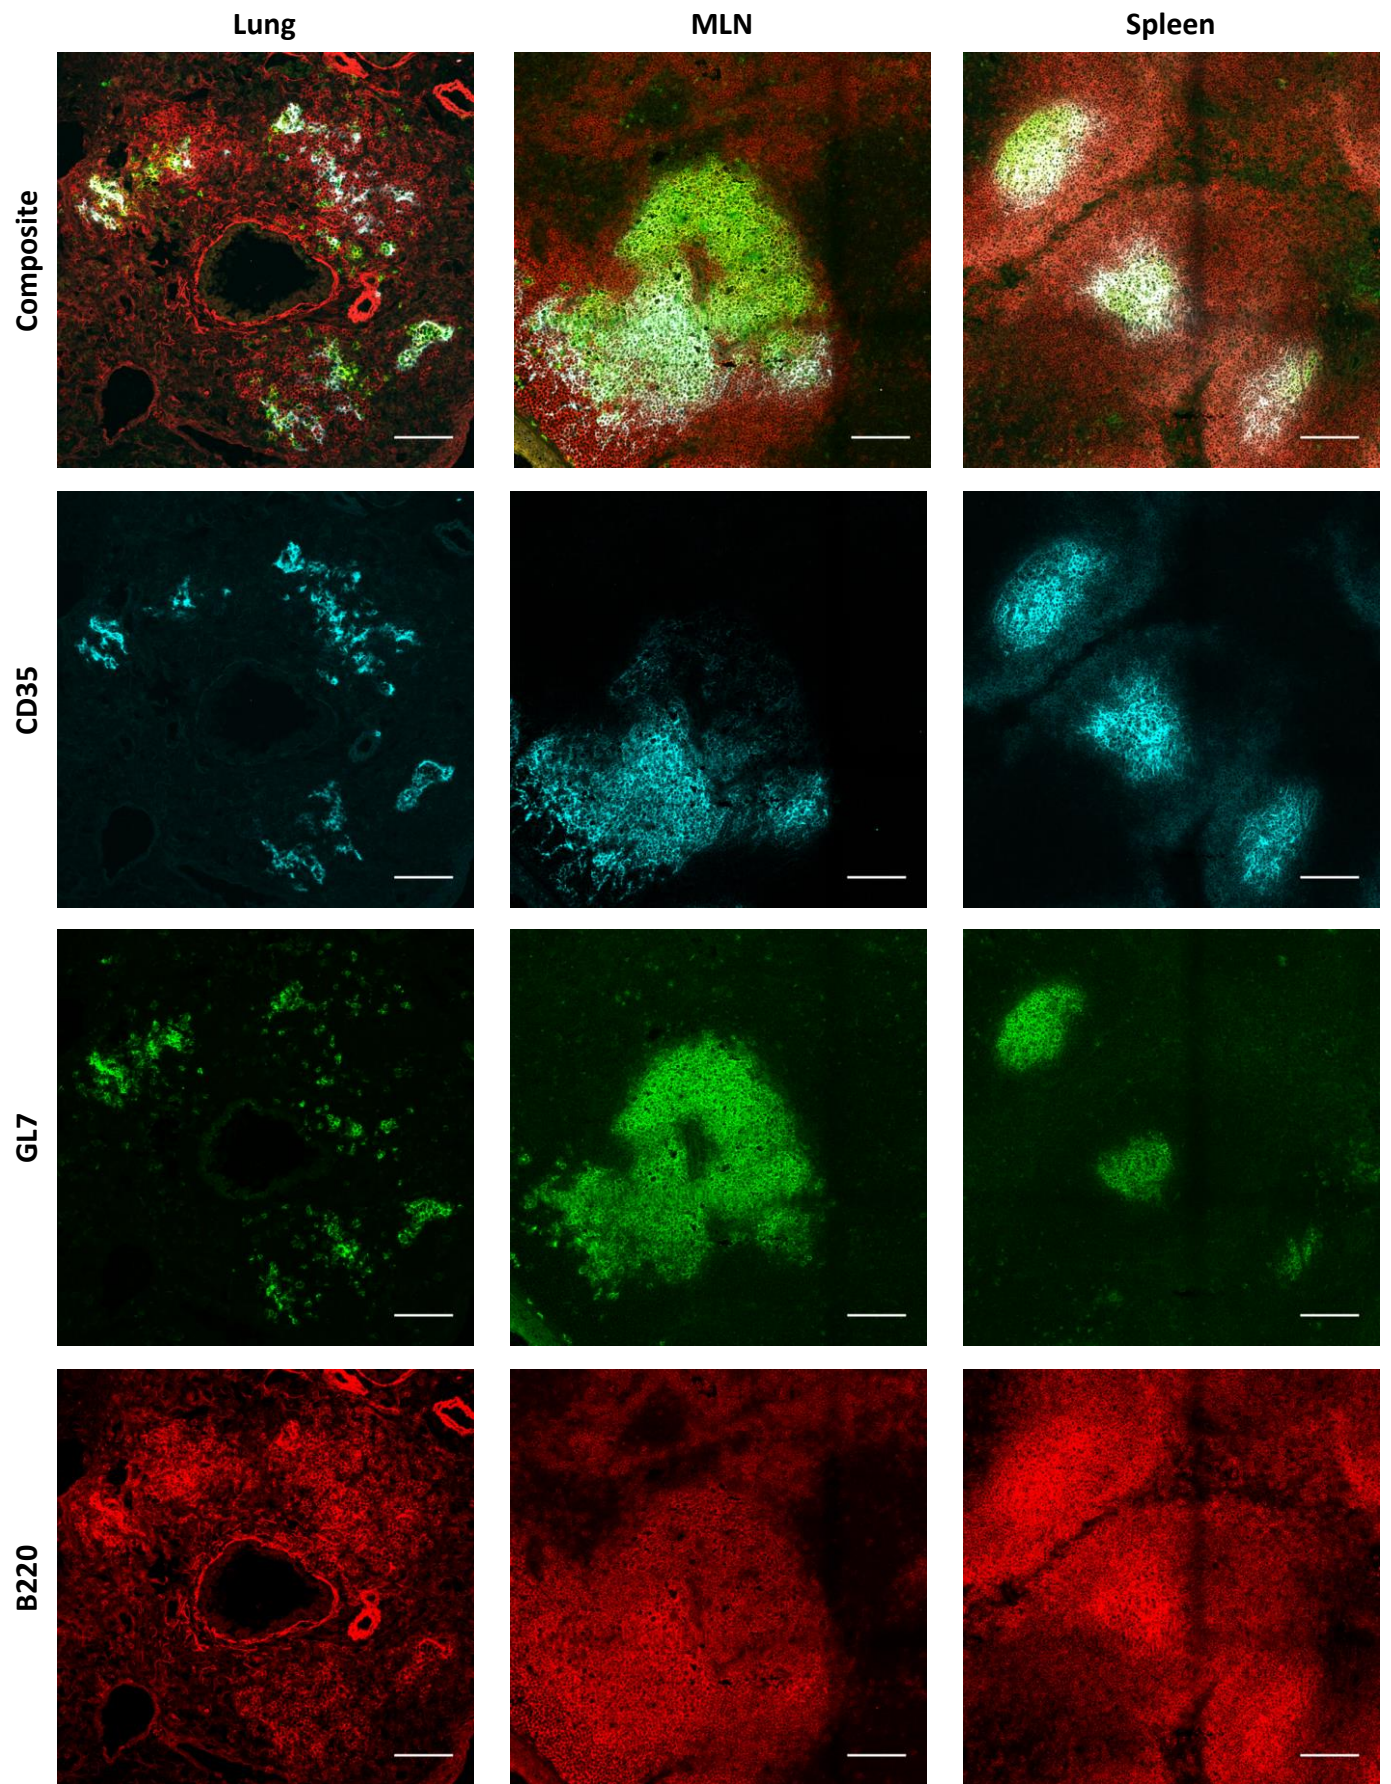

**Figure S4** – Comparison of germinal centres of lungs, spleen and MLN from PR8-infected mice. Tissues were stained with CD35 (cyan), GL7 (green) and B220 (red); scale bar – 100  $\mu$ M.
